# Supplementary material for: Yolk–shell nanostructured Fe3O4@C magnetic nanoparticles with enhanced peroxidase-like activity for label-free colorimetric detection of H2O2and glucose
Source: Royal Society of Chemistry journal article supplement (doi:10.1039/c7nr00819h), 2017-01-01
Supplement: c7nr00819h1.pdf [file c7nr00819h1.pdf]

## Electronic Supporting Information

### **Yolk-shell nanostructured Fe<sub>3</sub>O<sub>4</sub>@C magnetic nanoparticles with enhanced peroxidase-like activity for label-free colorimetric detection of H<sub>2</sub>O<sub>2</sub> and glucose**

Na Lu,<sup>a</sup> Min Zhang,<sup>b,\*</sup> Lei Ding,<sup>b</sup> Jing Zheng,<sup>b</sup> Caixia Zeng,<sup>a</sup> Yanli Wen,<sup>c</sup> Gang Liu,<sup>c</sup> Ali Aldahlbahi,<sup>d</sup> Jiye Shi,<sup>e</sup> Shiping Song,<sup>e</sup> Xiaolei Zuo,<sup>e</sup> and Lihua Wang<sup>e,\*</sup>

<sup>a</sup>*School of Materials Engineering and* <sup>b</sup>*College of Chemistry and Chemical Engineering, Shanghai University of Engineering Science, Shanghai 201620, China. E-mail: [zhangmin@sues.edu.cn](mailto:zhangmin@sues.edu.cn)*

<sup>c</sup>*Laboratory of Biometrology, Division of Chemistry and Ionizing Radiation Measurement Technology, Shanghai Institute of Measurement and Testing Technology, Shanghai 201203, China*

<sup>d</sup>*Chemistry Department, King Saud University, Riyadh 11451, Saudi Arabia*

<sup>e</sup>*Division of Physical Biology & Bioimaging Center, Shanghai Synchrotron Radiation Facility, Shanghai Institute of Applied Physics, Chinese Academy of Sciences, Shanghai 201800, China. E-mail: [wanglihua@sinap.ac.cn](mailto:wanglihua@sinap.ac.cn)*

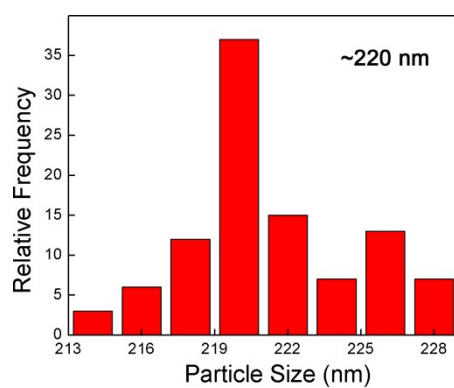

**Figure S1.** Distribution of the particle size of a batch of  $\text{Fe}_3\text{O}_4@C$  YSNs.

**Table S1.** Magnetic properties of bare  $\text{Fe}_3\text{O}_4$  MNPs and  $\text{Fe}_3\text{O}_4@C$  YSNs.

| Samples                        | Particle Size (nm) | $H_c$ (Oe) | $M_r$ (emu $\text{g}^{-1}$ ) | $M_s$ (emu $\text{g}^{-1}$ ) |
|--------------------------------|--------------------|------------|------------------------------|------------------------------|
| $\text{Fe}_3\text{O}_4$ MNPs   | 100-150            | 58         | 5                            | 36                           |
| $\text{Fe}_3\text{O}_4@C$ YSNs | 220-250            | 63         | 3                            | 30                           |

**Table S2.** Summary of glucose sensors based on different peroxidase mimetics.

|   | Nanozyme                                             | Linear range          | Detection Limit<br>( $\mu\text{M}$ ) | Ref       |
|---|------------------------------------------------------|-----------------------|--------------------------------------|-----------|
| 1 | $\text{Fe}_3\text{O}_4$                              | 0.05-1 mM             | 30                                   | 1         |
| 2 | Positively-charged gold NPs                          | 18-1100 $\mu\text{M}$ | 4.0                                  | 2         |
| 3 | Au@Ag nanorods                                       | 0.05-20 mM            | 39                                   | 3         |
| 4 | Janus hematite-silica<br>NPs                         | 0-20 $\mu\text{M}$    | 3.2                                  | 4         |
| 5 | DNA/CuAl-LDH<br>nanohybrids                          | 40-200 $\mu\text{M}$  | 8.0                                  | 5         |
| 6 | $\text{CeO}_2/\text{NT-TiO}_2@0.1$<br>nanocomposites | 10-500 $\mu\text{M}$  | 6.1                                  | 6         |
| 7 | $\text{Fe}_3\text{O}_4@\text{C}$ YSNs                | 1-10 $\mu\text{M}$    | 1.12                                 | This work |

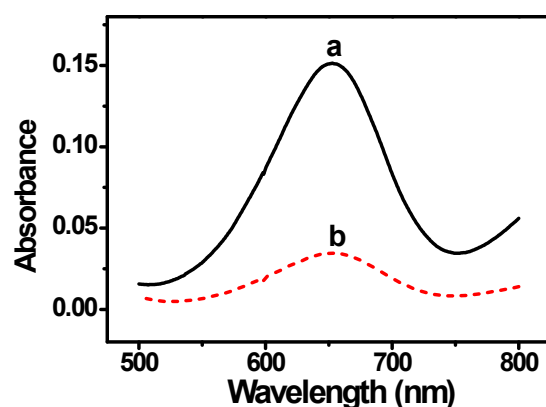

**Figure S2.** UV-Vis spectra of different solutions in the absence (a) or presence (b) of the human serum sample based on our biomimetic sensor.

### Notes and references

1. H. Wei and E. Wang, *Anal. Chem.*, 2008, **80**, 2250-2254.
2. Y. Jv, B. Li and R. Cao, *Chem. Coummun.*, 2010, **46**, 8017-8019.
3. L. Han, C. Li, T. Zhang, Q. Lang and A. Liu, *ACS Appl. Mater. Inter.*, 2015, **7**, 14463-14470
4. C. Lu, X. Liu, Y. Li, F. Yu, L. Tang, Y. Hu and Y. Ying, *ACS Appl. Mater. Inter.*, 2015, **7**, 15395-15402.
5. L. Chen, K. Sun, P. Li, X. Fan, J. Sun and S. Ai, *Nanoscale*, 2013, **5**, 10982-10988.
6. H. Zhao, Y. Dong, P. Jiang, G. Wang and J. Zhang, *ACS Appl. Mater. Inter.*, 2015, **7**, 6451-6461.
